# Supplementary material
Source: PubMed Central journal article supplement (PMC3963574)
Supplement: supp_tpc.113.120394_tpc120394_Supplemental_Data.pdf [file supp_tpc.113.120394_tpc120394_Supplemental_Data.pdf]

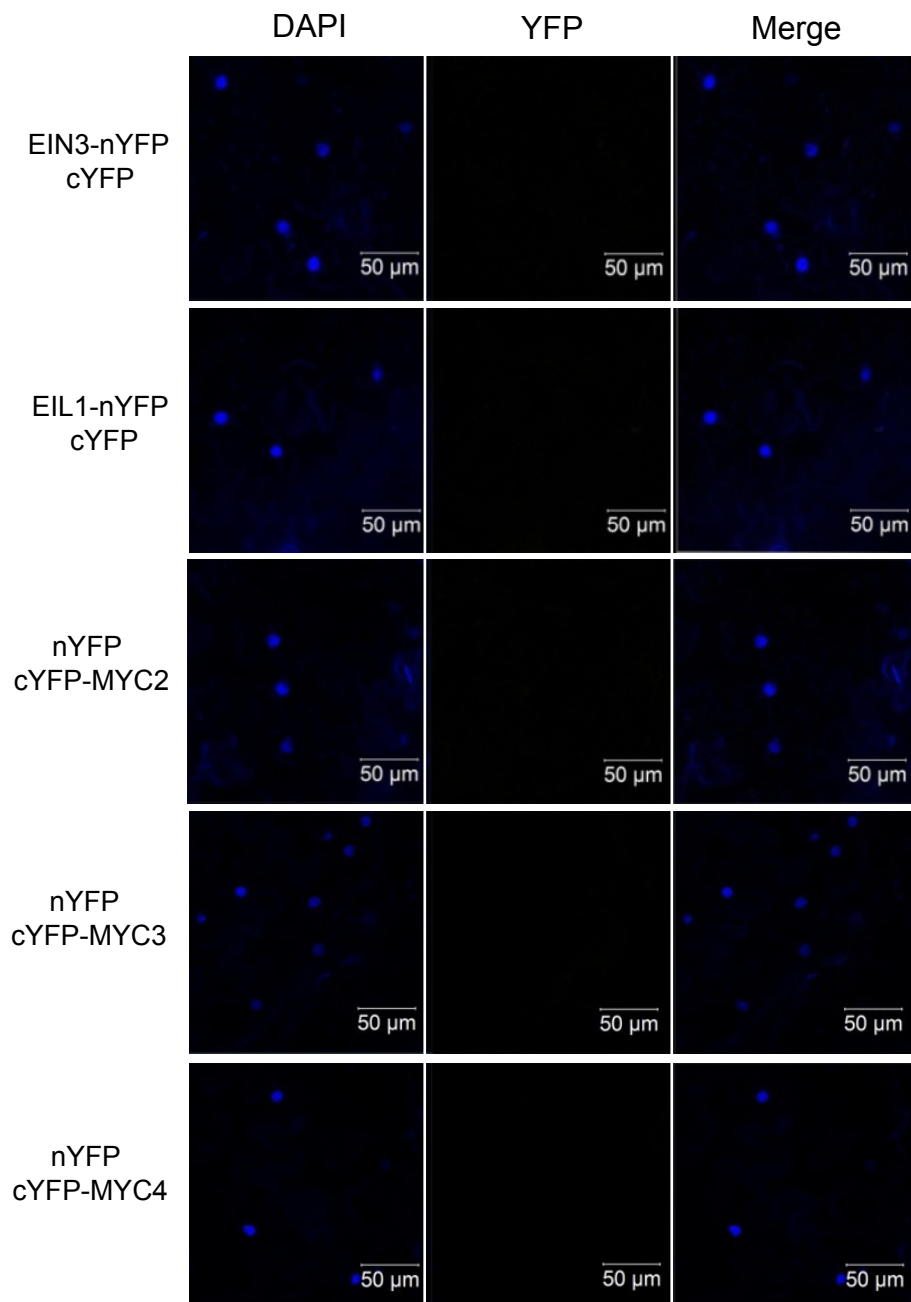

**Supplemental Figure 1. The Negative Controls for the BiFC Experiments.**

No signal of YFP fluorescence was detected 50 hours after co-expression of EIN3/EIL1-nYFP with cYFP, or nYFP with cYFP-MYC2/MYC3/MYC4 in leaves of *N. benthamiana*. The nuclei were indicated by DAPI staining.

**Supplemental Table 1. Primers Used for Vector Construction.**

|           |              |                                                                     |
|-----------|--------------|---------------------------------------------------------------------|
| EIN3 nYFP | Forward      | CGGACAAGTTTGTACAAAAAAGCAGGC<br>TCCATGATGTTTAATGAGATGGGAATGT<br>GTGG |
| EIN3 nYFP | Reverse      | CGGACCACTTTGTACAAGAAAGCTGGGT<br>CGAACCATATGGATACATCTTGCTGCTT<br>C   |
| EIL1-nYFP | Reverse      | CGGACAAGTTTGTACAAAAAAGCAGGC<br>TCCATGATGATGTTTAACGAGATGGGAA<br>TG   |
| EIL1-nYFP | Forward      | CGGACCACTTTGTACAAGAAAGCTGGGT<br>CGAACCATATTGATACATCTTGCTGCTG<br>CTG |
| cYFP MYC2 | Forward      | CGGACAAGTTTGTACAAAAAAGCAGGC<br>TCCATGACTGATTACCGGCTACAACCAA<br>C    |
| cYFP MYC2 | Reverse      | CGGACCACTTTGTACAAGAAAGCTGGGT<br>CTTAACCGATTTTTGAAATCAAACCTTGC       |
| cYFP MYC3 | Forward      | CGGACAAGTTTGTACAAAAAAGCAGGC<br>TCCATGAACGGCACAACATCATCAATCA<br>AC   |
| cYFP MYC3 | Reverse      | CGGACCACTTTGTACAAGAAAGCTGGGT<br>CTCAATAGTTTTCTCCGACTTTCGTCATC       |
| cYFP MYC4 | Forward      | CGGACAAGTTTGTACAAAAAAGCAGGC<br>TCCATGTCTCCGACGAATGTTCAAGTAA<br>CC   |
| cYFP MYC4 | Reverse      | CGGACCACTTTGTACAAGAAAGCTGGGT<br>CTCATGGACATTCTCCAACCTTCTCCG         |
| flag-EIN3 | Forward-SalI | ACGCGTCGACATGATGTTTAATGAGATG<br>GGAATGTG                            |
| flag-EIN3 | Reverse-SpeI | GGACTAGTTTAGAACCATATGGATACATC                                       |

|                               |               |                                           |
|-------------------------------|---------------|-------------------------------------------|
|                               |               | TTGCTGCTT                                 |
| ERF1pro-pGreenII<br>0800-LUC  | Forward-KpnI  | CGCGGTACCCAGGATTTAGAGGGGTC<br>ATCAG       |
| ERF1pro- pGreenII<br>0800-LUC | Reverse-BamHI | GCCGGATCCCGGTTAGGGATCGTTAGTG<br>GATTG     |
| HLS1pro-pGreenII<br>0800-LUC  | Forward-KpnI  | CGGGGTACGAGGAATACGATAGACATG<br>ACCTTTAG   |
| HLS1pro-pGreenII<br>0800-LUC  | Reverse-BamHI | CGCGGATCCGGTCTTTCAGAGTGAGAA<br>CAGAAG     |
| EIN3- pGreenII 62-SK          | Forward-XhoI  | CCGCTCGAGATGATGTTTAATGAGATGG<br>GAATGTG   |
| EIN3- pGreenII 62-SK          | Reverse-KpnI  | CGGGGTACCTTAGAACCATATGGATACAT<br>CTTGC    |
| EIL1- pGreenII 62-SK          | Forward-XhoI  | CCGCTCGAGATGATGATGTTAACGAGA<br>TGGGAATG   |
| EIL1-GreenII 62-SK            | Reverse-KpnI  | CGGGGTACCTCAGAACCATATTGATACAT<br>CTTGCTG  |
| MYC2- pGreenII 62-SK          | Forward-SmaI  | AGACCCGGGATGACTGATTACCGGCTAC              |
| MYC2- pGreenII 62-SK          | Reverse-KpnI  | CGGGGTACCTTAACCGATTTTGAATC                |
| DB MYC2                       | Forward- SmaI | TCCCCGGGGGATGACTGATTACCGGCT<br>ACAACCAACG |
| DB MYC2                       | Reverse- SmaI | TCCCCGGGGTTAACCGATTTTGAATC<br>AAACTTGCTC  |

**Supplemental Table 2. Primers Used for Quantitative Real-time PCR Analysis.**

|                     |         |                           |
|---------------------|---------|---------------------------|
| HLS1-Realtime PCR   | Forward | GAATCCGACATTCACC<br>TTCC  |
| HLS1-Realtime PCR   | Reverse | CATCCTCTAATCATGCCCA<br>CT |
| PDF1.2-Realtime PCR | Forward | TTTGCTGCTTTCGACGCAC       |
| PDF1.2-Realtime PCR | Reverse | GATTCTTGCATGCATTACT<br>G  |
| ORA59-Realtime PCR  | Forward | TTCTTCGACGTTGACATCT       |

|                      |         |                                |
|----------------------|---------|--------------------------------|
|                      |         | TCTC                           |
| ORA59-Realtime PCR   | Reverse | AAGAAGACGAAGAAGAT<br>GAATAGGAG |
| ERF1-Realtime PCR    | Forward | TTCCCTTCAACGAGAACG<br>A        |
| ERF1-Realtime PCR    | Reverse | GTTTGTTGCGTGGACTGC<br>T        |
| VSP1-Realtime PCR    | Forward | ACGTCCAGTCTTCGGCAT<br>CC       |
| VSP1-Realtime PCR    | Reverse | TAGTTGATGGACAGTCCC<br>TC       |
| VSP2-Realtime PCR    | Forward | TCAGTGACCGTTGGAAGT<br>TGTG     |
| VSP2-Realtime PCR    | Reverse | GTTCGAACCATTAGGCTTC<br>AATATG  |
| TAT3-Realtime PCR    | Forward | GCCTTCATTTATTCTCCAG<br>GAA     |
| TAT3-Realtime PCR    | Reverse | AGCTCGACGTTGCGTCTC             |
| CYP79B3-Realtime PCR | Forward | CTTGCTTACCGCTGATG<br>AA        |
| CYP79B3-Realtime PCR | Reverse | GCGTTTGATGGGTTGTCT<br>G        |
| BCAT4-Realtime PCR   | Forward | CTGTACTGGCACTGCTTC<br>CA       |
| BCAT4-Realtime PCR   | Reverse | ATAGCTTCGCAGCCAATG<br>TT       |
| BAT5-Realtime PCR    | Forward | TTCAAGATCCTCTCGTTG<br>GAG      |
| BAT5-Realtime PCR    | Reverse | GACGCCCATTAGAGACAT             |

|                     |         |                          |
|---------------------|---------|--------------------------|
|                     |         | AACA                     |
| Actin8-Realtime PCR | Forward | TCAGCACTTTCCAGCAGA<br>TG |
| Actin8-Realtime PCR | Reverse | CTGTGGACAATGCCTGGA<br>C  |
